# Supplementary material for: Does autoimmune thyroid disease affects rheumatoid arthritis disease activity or response to methotrexate?
Source: PubMed Central journal article supplement — RMD Open. 2020 Jul 14;6(2):e001282. doi: 10.1136/rmdopen-2020-001282 (PMC7425184; doi:10.1136/rmdopen-2020-001282), 2020-07-14
Supplement: rmdopen-2020-001282s001.pdf [file rmdopen-2020-001282s001.pdf]

## Online-only supplements

**Figure 1:** Flowchart of patients

**eText 1:** Description of standard treatment guidelines and tight-control follow-up in Swedish Rheumatology Units

**eText 2:** ATC codes in the Swedish prescribed drug register and ICD-codes in the Swedish cancer register

**eText 3:** Description of missing data of the DAS28 components and of multiple imputation

**Appendix Table I.** DAS28 parameters at baseline and 6 month follow-up visit for RA-patients in the Swedish Rheumatology Quality Register (SRQ), 2006-2016

**Appendix Table II.** Changes in DAS28 parameters from baseline to 3 and 6 months follow-up visit, among RA-patients in the Swedish Rheumatology Quality Register (SRQ), adjusted for baseline DAS28 parameters

**Appendix Table III.** DAS28 parameters at baseline, 3 and 6 months follow-up visit for RA-patients <45 years in the SRQ, 2006-2016

**Appendix Table IV.** Changes in DAS28 parameters from baseline, at 3 and 6 months follow-up visit, among RA-patients <45 years in the Swedish Rheumatology Quality Register (SRQ)

**Appendix Table V.** Association between autoimmune thyroid disease and response to methotrexate at 3 month follow-up visit among 4831 RA-patients (2666 non/moderate-, 2165 good responders) in the Swedish Rheumatology Quality Register (SRQ), *non-imputed dataset*

**Appendix Table VI.** Association between autoimmune thyroid disease and response to methotrexate at 6 month follow-up visit among 4996 RA-patients (3019 non/moderate-, 1977 good responders) in the Swedish Rheumatology Quality Register (SRQ), *imputed dataset*

**Appendix Table VII.** Association between autoimmune thyroid disease and response to methotrexate at 6 month follow-up visit among 4010 RA-patients (2352 non/moderate-, 1658 good responders) in the Swedish Rheumatology Quality Register (SRQ), *non-imputed dataset*

Figure 1: Flowchart of patients

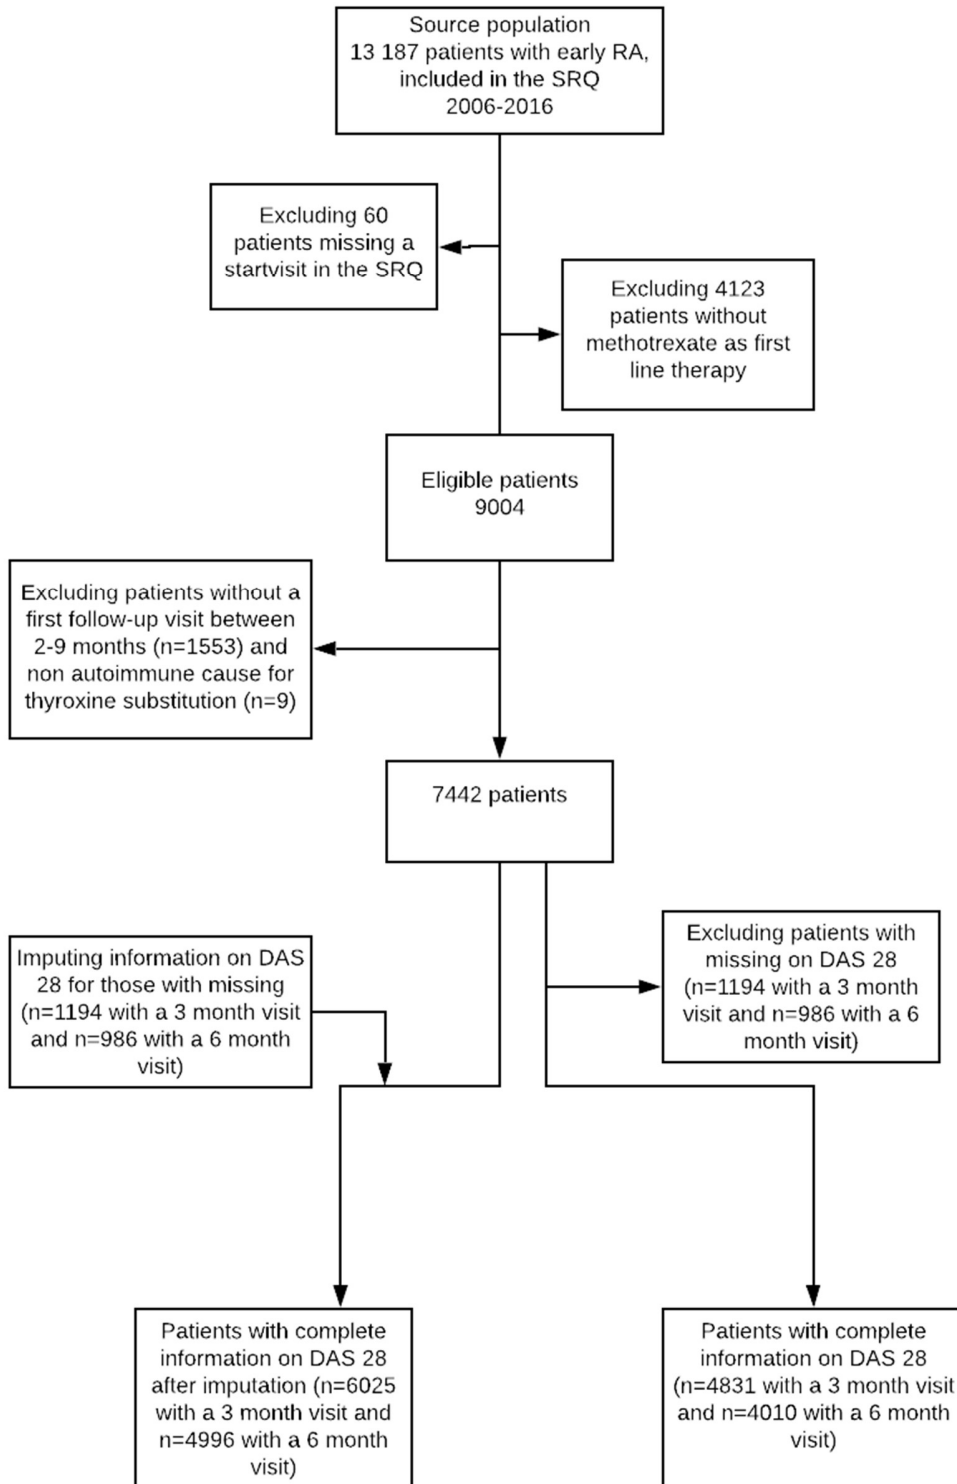

## **eText 1**

### **Description of standard treatment guidelines and tight-control follow-up in Swedish Rheumatology Units**

Methotrexate is the standard initial treatment for all patients with newly diagnosed RA in Swedish Rheumatology units, as long as there is no contraindication. The dose of Methotrexate is increased up to 20 mg per week, based on the disease activity score (DAS28-ESR). In addition, orally Prednisolone in low-dose the first 12 months, is recommended by the Swedish Society for Rheumatology. According to the Swedish guidelines a patient with early RA should be followed-up with tight control, resulting in a visit to the rheumatologist approximately every third month the first year after diagnosis. The goal is to treat the patient to remission, with a DAS28-ESR less than 2.6.

## **eText 2**

### **ATC codes in the Swedish prescribed drug register:**

H03AA01= levothyroxine, T4 (levaxin+euthyrox), H03AA02= liothyronin, T3 (liothyronin)

Excluding participants with prescriptions for iodine-containing drugs in the Swedish prescribed drug register: ATC-code: C01BD01 (Amiodarone), ATC-code: N05AN01 (Lithium), (ATC-code:L03AB01/L03AB04/L03AB05 (Interferon-alfa/alfa 2a/alfa 2b).

### **ICD-codes in the Swedish cancer register:**

Excluding participants with diagnosis codes for thyroid cancer in the Swedish cancer register icd7=194 or icd9=193 or icd10=c73

## **eText3**

### **Description of missing data of the DAS28 components**

The number of missing for the DAS28 variables was approximately 20% overall. For every DAS28 component the number of missing at baseline was: 7% for patient global, 5% for ESR, 2% for swollen joint count, 2% for tender joint count and 12% for DAS28. The corresponding figures for the 3 month visit was: 4% for patient global, 7% for ESR, 1% for Swollen joint count, 2% for Tender joint count and 11% for DAS28.

### **Description of multiple imputation**

Missing values were sequentially imputed using logistic regression models. Variables with missing information that were imputed: smoking, response states (non/moderate and good EULAR response), Health Assessment Questionnaire Disability Index (HAQ), (scoring disability from 0-3, where 0=no disability, 3=unable to to). These variables were imputed using the following variables as predictors: prednisolone, sex, rheumatoid factor,

radiological joint damage, age, AITD, DAS28-ESR, DAS28-CRP, tender joint count, patients' global assessment, ESR, CRP, swollen joint count, VAS pain, physicians' assessment of disease activity (add scale), sero-status (RF positive/negative), quality of life (EQ5D) and fatigue (100 mm visual analog scale). In the following imputation steps, the variables previously imputed were additionally included as predictors. Fifty imputed datasets were created and analyzed by logistic regression applying the generalized-estimating-equation method when estimating parameters and covariance matrices, which then were analyzed by the procedure MIANALYZE. To compare the imputed datasets, we also performed a complete case analysis.

**Appendix Table I.** DAS28 parameters at baseline and at the 6-month follow-up visit for RA-patients in the Swedish Rheumatology Quality Register (SRQ), 2006-2016

|                               | Patients with complete information at 6 month follow-up (n=4010) |                   |                                        |               |                          |                   |                                        |               |
|-------------------------------|------------------------------------------------------------------|-------------------|----------------------------------------|---------------|--------------------------|-------------------|----------------------------------------|---------------|
|                               | Baseline                                                         |                   |                                        |               | 6 months follow-up visit |                   |                                        |               |
|                               | AITD+<br>(n=441)                                                 | AITD-<br>(n=3569) | mean difference<br>estimate( $\beta$ ) | 95% CI        | AITD+<br>(n=441)         | AITD-<br>(n=3569) | mean difference<br>estimate( $\beta$ ) | 95% CI        |
| Patient global, mean $\pm$ SD | 54.6 $\pm$ 27.1                                                  | 50.7 $\pm$ 25.8   | 1.33                                   | 0.21 to 5.41  | 32.7 $\pm$ 25.5          | 29.8 $\pm$ 25.0   | 2.05                                   | -0.47 to 4.56 |
| ESR, mean $\pm$ SD            | 32.7 $\pm$ 22.5                                                  | 31.4 $\pm$ 23.6   | -0.72                                  | -3.03 to 1.60 | 18.5 $\pm$ 15.3          | 16.2 $\pm$ 14.2   | 0.86                                   | -0.56 to 2.27 |
| SJC, mean $\pm$ SD            | 7.8 $\pm$ 5.7                                                    | 7.7 $\pm$ 5.6     | 0.03                                   | -0.53 to 0.59 | 2.0 $\pm$ 3.2            | 1.9 $\pm$ 3.0     | 0.05                                   | -0.26 to 0.35 |
| TJC, mean $\pm$ SD            | 7.4 $\pm$ 5.9                                                    | 7.3 $\pm$ 5.9     | 0.06                                   | -0.54 to 0.66 | 2.8 $\pm$ 4.4            | 2.5 $\pm$ 3.9     | 0.28                                   | -0.13 to 0.68 |
| DAS28, mean $\pm$ SD          | 5.1 $\pm$ 1.4                                                    | 5.0 $\pm$ 1.4     | 0.04                                   | -0.10 to 0.18 | 3.2 $\pm$ 1.3            | 3.0 $\pm$ 1.3     | 0.09                                   | -0.05 to 0.22 |
| HAQ, mean $\pm$ SD            | 1.1 $\pm$ 0.7                                                    | 1.0 $\pm$ 0.6     | 0.08                                   | 0.02 to 0.15  | 0.6 $\pm$ 0.6            | 0.5 $\pm$ 0.5     | 0.04                                   | -0.01 to 0.10 |
| VAS pain, mean $\pm$ SD       | 55.4 $\pm$ 27.6                                                  | 51.7 $\pm$ 25.6   | 3.13                                   | 0.53 to 5.72  | 31.4 $\pm$ 25.7          | 28.8 $\pm$ 24.6   | 2.12                                   | -0.36 to 4.61 |

Abbreviations: RA=rheumatoid arthritis, AITD= autoimmune thyroid disease, 95% CI=95% confidence interval, ESR=erythrocyte sedimentation rate, SJC=swollen joint count, TJC=tender joint count, HAQ=health assessment questionnaire, SD=Standard deviation. For each of the seven variables named in the first column and for each time point, the estimate ( $\beta$ ) was provided by a linear regression model for which the variable in the first column was the dependent variable, AITD the independent variable, and age and sex used as adjustment. The estimate  $\beta$  gives the mean difference (given the linear model) between the two types of patients, a positive value meaning that the AITD+ patients have on average a higher value than the AITD- patients.

**Appendix Table II.** Changes in DAS28 parameters from baseline to 3 and 6 months, among RA-patients in the Swedish Rheumatology Quality Register (SRQ)

|                           | Patients with complete information at 3 months follow-up visit (n=4831) |                 |                                 |               |          | Patient with complete information at 6 months follow-up visit (n=4010) |                 |                                 |               |          |
|---------------------------|-------------------------------------------------------------------------|-----------------|---------------------------------|---------------|----------|------------------------------------------------------------------------|-----------------|---------------------------------|---------------|----------|
|                           | AITD+<br>n=531                                                          | AITD-<br>n=4301 | mean difference<br>estimate (β) | 95% CI        | <i>P</i> | AITD+<br>n=441                                                         | AITD-<br>n=3569 | mean difference<br>estimate (β) | 95% CI        | <i>P</i> |
| Δ Patient global, mean±SD | 27.6 (29.1)                                                             | 23.7 (29.2)     | 0.62                            | -1.46 to 2.70 | 0.5607   | 22.0 (32.6)                                                            | 20.9 (30.2)     | -1.29                           | -3.71 to 1.13 | 0.2953   |
| Δ ESR, mean±SD            | 15.0 (22.1)                                                             | 15.1 (21.1)     | -0.60                           | -1.81 to 0.62 | 0.3361   | 14.2 (19.5)                                                            | 15.2 (21.7)     | -1.04                           | -2.33 to 0.25 | 0.1156   |
| Δ SJC, mean±SD            | 5.6 (5.7)                                                               | 5.8 (5.5)       | -0.07                           | -0.35 to 0.22 | 0.6485   | 5.9 (6.0)                                                              | 5.9 (5.8)       | -0.04                           | -0.34 to 0.26 | 0.7733   |
| Δ TJC, mean±SD            | 4.8 (6.0)                                                               | 4.8 (5.9)       | -0.25                           | -0.60 to 0.10 | 0.1585   | 4.6 (6.1)                                                              | 4.8 (6.0)       | -0.26                           | -0.65 to 0.12 | 0.1759   |
| Δ DAS28, mean±SD          | 2.0 (1.6)                                                               | 2.0 (1.5)       | -0.03                           | -0.14 to 0.08 | 0.588    | 1.9 (1.6)                                                              | 2.0 (1.6)       | -0.08                           | -0.20 to 0.05 | 0.2417   |

Abbreviations: RA=rheumatoid arthritis, AITD= autoimmune thyroid disease, 95% CI=95% confidence interval, ESR=erythrocyte sedimentation rate, SJC=swollen joint count, TJC=tender joint count,

HAQ=health assessment questionnaire, SD=Standard deviation. For each of the variables named in the first column and for each time point, the estimate (β) was provided by a linear regression model for which the variable in the first column was the dependent variable, AITD the independent variable, and age, sex and baseline DAS28/DAS28 parameter used as adjustment. The estimate (β) shows how differently the two types of patients were evolving between baseline and 3/6 months. For a given variable in the first column, a positive value means that the AITD+ patients have on average evolved (decreased) more than the AITD- patients.

**Appendix Table III.** DAS28 parameters at baseline, 3 and 6 months for RA-patients <45 years in the SRQ, 2006-2016

| mean, ±SD      | Patients with complete information at 3 month follow-up visit (n=483) |                |             |                |                          |                |              |                | Patients with complete information at 6 month follow-up (n=424) |                |              |                |                          |                |              |                |
|----------------|-----------------------------------------------------------------------|----------------|-------------|----------------|--------------------------|----------------|--------------|----------------|-----------------------------------------------------------------|----------------|--------------|----------------|--------------------------|----------------|--------------|----------------|
|                | Baseline                                                              |                |             |                | 3 months follow-up visit |                |              |                | Baseline                                                        |                |              |                | 6 months follow-up visit |                |              |                |
|                | AITD+<br>n=37                                                         | AITD-<br>n=446 | estimate(β) | (95% CI)       | AITD+<br>n=37            | AITD-<br>n=446 | estimate (β) | 95% CI         | AITD+<br>n=24                                                   | AITD-<br>n=400 | estimate (β) | 95% CI         | AITD+<br>n=24            | AITD-<br>n=400 | estimate (β) | 95% CI         |
| Patient global | 49.3 (21.5)                                                           | 52.4 (23.9)    | -3.54       | -11.57 to 4.50 | 35.1 (22.1)              | 29.1 (24.8)    | 5.98         | -2.37 to 14.34 | 47.4 (23.0)                                                     | 51.1 (24.3)    | -3.43        | -13.49 to 6.62 | 37.7 (29.2)              | 29.2 (25.6)    | 8.36         | -2.36 to 19.08 |
| ESR            | 23.2 (23.8)                                                           | 22.1 (19.7)    | 0.73        | -6.04 to 7.50  | 12.1 (11.3)              | 11.3 (11.2)    | 0.47         | -3.28 to 4.23  | 20.9 (20.8)                                                     | 22.8 (20.7)    | -2.20        | -10.73 to 6.33 | 11.1 (11.5)              | 11.2 (11.5)    | -0.39        | -5.12 to 4.35  |
| SJC            | 5.9 (5.5)                                                             | 6.9 (5.1)      | -0.97       | -2.71 to 0.78  | 2.1 (2.8)                | 2.0 (2.9)      | 0.07         | -0.93 to 1.06  | 7.0 (5.8)                                                       | 7.0 (5.2)      | 0.13         | -2.03 to 2.30  | 2.0 (2.7)                | 1.6 (2.6)      | 0.46         | -0.64 to 1.55  |
| TJC            | 6.5 (5.3)                                                             | 7.7 (6.0)      | -1.25       | -3.26 to 0.75  | 2.7 (2.9)                | 2.8 (4.0)      | -0.19        | -1.53 to 1.16  | 7.1 (5.7)                                                       | 7.9 (6.1)      | -0.77        | -3.28 to 1.74  | 3.3 (4.0)                | 2.6 (4.1)      | 0.65         | -1.04 to 2.34  |
| DAS28          | 4.5 (1.3)                                                             | 4.7 (1.4)      | -0.26       | -0.72 to 0.20  | 3.0 (1.1)                | 2.8 (1.4)      | 0.18         | -0.28 to 0.63  | 4.6 (1.4)                                                       | 4.7 (1.4)      | -0.16        | -0.74 to 0.42  | 3.0 (1.2)                | 2.7 (1.3)      | 0.32         | -0.22 to 0.87  |
| HAQ            | 0.9 (0.6)                                                             | 0.9 (0.6)      | -0.03       | -0.23 to 0.18  | 0.4 (0.4)                | 0.4 (0.5)      | -0.04        | -0.21 to 0.13  | 1.0 (0.7)                                                       | 0.9 (0.6)      | 0.09         | -0.18 to 0.36  | 0.5 (0.4)                | 0.4 (0.5)      | 0.10         | -0.11 to 0.31  |
| VAS pain       | 55.0 (24.8)                                                           | 54.9 (23.6)    | 0.45        | -7.55 to 8.45  | 36.9 (23.7)              | 29.1 (24.4)    | 8.49         | 0.24 to 16.73  | 59.0 (25.1)                                                     | 54.8 (24.4)    | 4.76         | -5.34 to 14.85 | 36.1 (25.6)              | 29.6 (24.8)    | 6.71         | -3.60 to 17.02 |

Abbreviations: RA=rheumatoid arthritis, AITD= autoimmune thyroid disease, 95% CI=95% confidence interval, ESR=erythrocyte sedimentation rate, SJC=swollen joint count, TJC=tender joint count,

HAQ=health assessment questionnaire, SD=Standard deviation. For each of the seven variables named in the first column and for each time point, the estimate (β) was provided by a linear regression model for which the variable in the first column was the dependent variable, AITD the independent variable, and age and sex used as adjustment. The estimate β gives the mean difference (given the linear model) between the two types of patients, a positive value meaning that the AITD+ patients have on average a higher value than the AITD- patients.

**Appendix Table IV.** Changes in DAS28 parameters from baseline to 3 and 6 months, among RA-patients <45 years in the Swedish Rheumatology Quality Register (SRQ)

|                           | Patients with complete information at 3 months follow-up visit (n=483) |             |                           |                |          | Patient with complete information at 6 months follow-up visit (n=424) |             |                           |                 |          |
|---------------------------|------------------------------------------------------------------------|-------------|---------------------------|----------------|----------|-----------------------------------------------------------------------|-------------|---------------------------|-----------------|----------|
|                           | AITD+                                                                  | AITD-       | mean difference           | 95% CI         | <i>P</i> | AITD+                                                                 | AITD-       | mean difference           | 95% CI          | <i>P</i> |
|                           | n=37                                                                   | n=446       | estimate (β) <sup>3</sup> |                |          | n=24                                                                  | n=400       | estimate (β) <sup>3</sup> |                 |          |
| Δ Patient global, mean±SD | 14.2 (24.9)                                                            | 23.3 (28.9) | -9.52                     | -19.22 to 0.18 | 0.05     | 9.7 (34.6)                                                            | 21.9 (29.7) | -11.8                     | -24.26 to 0.70  | 0.06     |
| Δ ESR, mean±SD            | 11.1 (20.7)                                                            | 10.8 (17.5) | 0.26                      | -5.77 to 6.28  | 0.93     | 9.8 (16.2)                                                            | 11.6 (19.1) | -1.81                     | -9.67 to 6.04   | 0.65     |
| Δ SJC, mean±SD            | 3.9 (5.8)                                                              | 4.9 (5.0)   | -1.04                     | -2.74 to 0.67  | 0.23     | 5.1 (5.0)                                                             | 5.4 (5.2)   | -0.32                     | -2.49 to 1.85   | 0.77     |
| Δ TJC, mean±SD            | 3.8 (5.7)                                                              | 4.9 (5.7)   | -1.07                     | -3.01 to 0.87  | 0.28     | 3.8 (5.0)                                                             | 5.3 (6.3)   | -1.43                     | -4.01 to 1.15   | 0.28     |
| Δ DAS28, mean±SD          | 1.4 (1.6)                                                              | 1.9 (1.5)   | -0.44                     | -0.94 to 0.07  | 0.09     | 1.5 (1.6)                                                             | 2.0 (1.6)   | -0.49                     | -1.15 to 0.18   | 0.15     |
| Δ HAQ, mean±SD            | 0.5 (0.6)                                                              | 0.5 (0.6)   | -0.02                     | -0.23 to 0.18  | 0.82     | 0.5 (0.7)                                                             | 0.5 (0.6)   | 0                         | -0.27 to 0.27   | 0.99     |
| Δ VAS pain, mean±SD       | 18.1 (27.6)                                                            | 26.3 (29.4) | -8.20                     | -17.89 to 1.48 | 0.10     | 22.8 (33.2)                                                           | 25.1 (28.9) | -1.95                     | -14.06 to 10.15 | 0.75     |

Abbreviations: RA=rheumatoid arthritis, AITD= autoimmune thyroid disease, 95% CI=95% confidence interval, ESR=erythrocyte sedimentation rate, SJC=swollen joint count, TJC=tender joint count, HAQ=health assessment questionnaire, SD=Standard deviation. For each of the seven variables named in the first column and for each time point, the estimate (β) was provided by a linear regression model for which the variable in the first column was the dependent variable, AITD the independent variable, and age and sex used as adjustment. The estimate (β) shows how differently the two types of patients were evolving between baseline and 3/6 months. For a given variable in the first column, a positive value means that the AITD+ patients have on average evolved (decreased) more than the AITD- patients.



**Appendix Table V.** Association between autoimmune thyroid disease and response to methotrexate at 3 month follow-up visit among 4831 RA-patients (2666 non/moderate-, 2165 good responders) in the Swedish Rheumatology Quality Register (SRQ), non-imputed dataset

|                          | Number (%) of AITD in<br>non/moderate responders <sup>a</sup> (cases) | Number (%) of AITD in good<br>responders <sup>a</sup> (controls) | OR (95% CI) <sup>b</sup> |
|--------------------------|-----------------------------------------------------------------------|------------------------------------------------------------------|--------------------------|
| Overall                  | 291 (11)                                                              | 239 (11)                                                         | 0.92 (0.77-1.11)         |
| Sex                      |                                                                       |                                                                  |                          |
| women                    | 259 (14)                                                              | 208 (15)                                                         | 0.89 (0.73-1.09)         |
| men                      | 32 (4)                                                                | 31 (4)                                                           | 1.09 (0.65-1.80)         |
| Agegroup                 |                                                                       |                                                                  |                          |
| <45 years                | 25 (10)                                                               | 12 (5)                                                           | 1.88 (0.92-3.87)         |
| ≥45 years                | 266 (11)                                                              | 227 (12)                                                         | 0.87 (0.72-1.06)         |
| Serostatus               |                                                                       |                                                                  |                          |
| RF and/or ACPA positive  | 198 (11)                                                              | 158 (11)                                                         | 0.93 (0.74-1.17)         |
| RF and ACPA negative     | 80 (10)                                                               | 69 (11)                                                          | 0.90 (0.63-1.27)         |
| serostatatus unspecified | 13 (21)                                                               | 12 (18)                                                          | 1.09 (0.44-2.68)         |

Abbreviations: RA=rheumatoid arthritis, AITD= autoimmune thyroid disease, OR=odds ratio, 95% CI=95% confidence interval, a According to EULAR response criteria. If change of dmard at follow-up visit=non responder. Values are the numbers (%). b Adjusted for age and sex

**Appendix Table VI.** Association between autoimmune thyroid disease and response to methotrexate at 6 month follow-up visit among 4996 RA-patients (3019 non/moderate-, 1977 good responders) in the Swedish Rheumatology Quality Register (SRQ), imputed dataset.

|                          | Number (%) of AITD in<br>non/moderate responders <sup>a</sup> (cases) | Number (%) of AITD in good<br>responders <sup>a</sup> (controls) | OR (95% CI) <sup>b</sup> | OR (95% CI) <sup>c</sup> |
|--------------------------|-----------------------------------------------------------------------|------------------------------------------------------------------|--------------------------|--------------------------|
| Overall                  | 360 (12)                                                              | 199 (10)                                                         | 1.16 (0.95-1.42)         | 1.14 (0.93-1.40)         |
| Sex                      |                                                                       |                                                                  |                          |                          |
| women                    | 323 (15)                                                              | 176 (14)                                                         | 1.25 (0.91-1.39)         | 1.10 (0.88-1.36)         |
| men                      | 37 (4)                                                                | 23 (3)                                                           | 1.38 (0.77-2.47)         | 1.37 (0.76-2.46)         |
| Agegroup                 |                                                                       |                                                                  |                          |                          |
| <45 years                | 28 (8)                                                                | 6 (3)                                                            | 2.75 (1.04-7.28)         | 2.69 (1.00-7.23)         |
| >=45 years               | 332 (12)                                                              | 193 (11)                                                         | 1.11 (0.90-1.37)         | 1.09 (0.89-1.35)         |
| Serostatus               |                                                                       |                                                                  |                          |                          |
| RF and/or ACPA positive  | 254 (12)                                                              | 131 (10)                                                         | 1.24 (0.97-1.58)         | 1.21 (0.95-1.55)         |
| RF and ACPA negative     | 96 (11)                                                               | 58 (10)                                                          | 1.11 (0.76-1.61)         | 1.10 (0.75-1.60)         |
| serostatatus unspecified | 10 (13)                                                               | 10 (23)                                                          | 0.47 (0.16-1.42)         | 0.44 (0.14-1.41)         |

<sup>a</sup> According to EULAR response criteria including imputed values on response status. Values are the numbers (%). Abbreviations: RA=rheumatoid arthritis, AITD= autoimmune thyroid disease,

OR=odds ratio, 95% CI=95% confidence interval, <sup>b</sup> Adjusted for age and sex, <sup>c</sup> Adjusted for age, sex, haq, smoking, cortisone. Multiple imputations=50.

**Appendix Table VII.** Association between autoimmune thyroid disease and response to methotrexate at 6 month follow-up visit among 4010 RA-patients (2352 non/moderate-, 1658 good responders) in the Swedish Rheumatology Quality Register (SRQ), non-imputed dataset

|                          | Number of AITD in<br>non/moderate responders <sup>a</sup> (cases) | Number of AITD in good<br>responders <sup>a</sup> (controls) | OR (95% CI) <sup>b</sup> |
|--------------------------|-------------------------------------------------------------------|--------------------------------------------------------------|--------------------------|
| Overall                  | 282 (12)                                                          | 159 (10)                                                     | 1.22 (0.99-1.50)         |
| Sex                      |                                                                   |                                                              |                          |
| women                    | 252 (15)                                                          | 142 (14)                                                     | 1.15 (0.92-1.44)         |
| men                      | 30 (4)                                                            | 17 (3)                                                       | 1.70 (0.93-3.12)         |
| Agegroup                 |                                                                   |                                                              |                          |
| <45 years                | 20 (8)                                                            | 4 (2)                                                        | 3.39 (1.13-10.16)        |
| ≥45 years                | 262 (13)                                                          | 155 (10)                                                     | 1.16 (0.93-1.43)         |
| Serostatus               |                                                                   |                                                              |                          |
| RF and/or ACPA positive  | 190 (12)                                                          | 105 (10)                                                     | 1.23 (0.95-1.58)         |
| RF and ACPA negative     | 84 (12)                                                           | 45 (9)                                                       | 1.35 (0.91-2.01)         |
| serostatatus unspecified | 8 (15)                                                            | 9 (24)                                                       | 0.55 (0.18-1.73)         |

<sup>a</sup> According to EULAR response criteria. If change of dmarc at follow-up visit=non responder. Values are the numbers (%). Abbreviations: RA=rheumatoid arthritis, AITD= autoimmune thyroid disease,

OR=odds ratio, 95% CI=95% confidence interval, <sup>b</sup> Adjusted for age and sex
